# Supplementary material for: Randomised controlled trial of GM-CSF in critically ill patients with impaired neutrophil phagocytosis
Source: PubMed Central journal article supplement (PMC6166597; doi:10.1136/thoraxjnl-2017-211323), 2018-07-31
Supplement: thoraxjnl-2017-211323supp001.pdf [file thoraxjnl-2017-211323supp001.pdf]

SUPPLEMENTAL DATA

**Randomised controlled trial of GM-CSF in critically ill patients with impaired neutrophil phagocytosis**

EM Pinder, AJ Rostron et al

## SUPPLEMENTARY TABLES

**Table S1. Exclusion criteria.**

- Absence/refusal of informed consent
- Current prescription of a colony-stimulating factor
- History of allergy/adverse reaction to GM-CSF
- Total white cell count  $>30 \times 10^9/L$  at the time of screening
- Haemoglobin  $< 7.5g/dL$  at the time of screening
- Age  $< 18$  years
- Pregnancy or lactation
- Known in-born errors of neutrophil metabolism
- Known haematological malignancy and/or known to have  $>10\%$  peripheral blood blast cells
- Known aplastic anaemia or pancytopenia
- Platelet count  $<50 \times 10^9/L$
- Chemotherapy or radiotherapy within the last 24 hours
- Solid organ or bone marrow transplantation; use of maintenance immunosuppressive drugs other than maintenance corticosteroids (allowed up to  $10mg$  prednisolone/day or equivalent)
- Known HIV infection
- Active connective tissue disease (e.g. rheumatoid disease, systemic lupus erythematosus) requiring active pharmacological treatment
- ST-segment elevation myocardial infarction, acute pericarditis (by electrocardiographic criteria) or pulmonary embolism (radiologically confirmed) in the previous week
- Involvement in any study involving an investigational medicinal product in the previous 30 days

**Table S2. Reasons for exclusion up to the point of obtaining consent.**

| <b>Satisfied exclusion criteria in Supplemental Table S1</b>                                                                                       | <b>n</b>   |
|----------------------------------------------------------------------------------------------------------------------------------------------------|------------|
| Absence /refusal of informed consent                                                                                                               | 44         |
| Current prescription of a colony-stimulating factor                                                                                                | 6          |
| History of allergy / adverse reaction to GM-CSF                                                                                                    | 5          |
| Total white cell count > 30x10 <sup>9</sup> /L at the time of screening                                                                            | 20         |
| Haemoglobin < 7.5g/dL at the time of screening                                                                                                     | 19         |
| Age < 18 years                                                                                                                                     | 7          |
| Pregnancy or lactation                                                                                                                             | 9          |
| Known in-born error of neutrophil metabolism                                                                                                       | 4          |
| Known haematological malignancy and / or known to have > 10% peripheral blood blast cells                                                          | 14         |
| Known aplastic anaemia or pancytopenia                                                                                                             | 3          |
| Platelet count < 50x10 <sup>9</sup> /L                                                                                                             | 24         |
| Chemotherapy or radiotherapy within the last 24 hours                                                                                              | 10         |
| Solid organ or bone marrow transplantation                                                                                                         | 22         |
| Use of maintenance immunosuppressive drugs other than maintenance corticosteroids (allowed up to 10mg prednisolone/day or equivalent)              | 14         |
| Known HIV infection                                                                                                                                | 10         |
| Active connective tissue disease (e.g. rheumatoid disease, systemic lupus erythematosus) requiring active pharmacological treatment                | 5          |
| ST segment elevation myocardial infarction, acute pericarditis (by ECG criteria) or pulmonary embolism (radiologically confirmed) in previous week | 32         |
| Involvement in any study involving an investigational medicinal product in the previous 30 days                                                    | 13         |
| Any combination of above                                                                                                                           | 9          |
|                                                                                                                                                    |            |
| <b>Other</b>                                                                                                                                       |            |
| Due for discharge from critical care on day of screening                                                                                           | 45         |
| ICU clinical consultant decided participation not appropriate                                                                                      | 13         |
| Specialty clinician not in agreement with patient's participation                                                                                  | 35         |
| No laboratory research personnel available                                                                                                         | 7          |
| Patient previously enrolled                                                                                                                        | 1          |
| Frequent refusal of treatment by patient                                                                                                           | 1          |
| Other                                                                                                                                              | 8          |
|                                                                                                                                                    |            |
| <b>TOTAL</b>                                                                                                                                       | <b>380</b> |

**Table S3. Study drug termination criteria.**

- maximum treatment period (4 daily doses)
- study drug-related serious adverse reaction
- discharge from a critical care environment
- death
- discontinuation of active medical treatment
- the patient, personal legal representative or professional legal representative requests withdrawal from the study
- decision by the attending clinician that the study drug should be discontinued on safety grounds.

In the following situations consideration will be given to either discontinuing the study drug or reducing the dose by half to minimize the risk of complications

- white blood count > 50,000 cells/mm<sup>3</sup>
- platelet count > 500,000 cells/mm<sup>3</sup>

**Table S4. Deaths.**

| Group     | Time from randomisation to death (days) | Comments/cause of death                                                                 |
|-----------|-----------------------------------------|-----------------------------------------------------------------------------------------|
| Placebo   | 14                                      | Multi-organ failure                                                                     |
| Placebo   | 4                                       | Refractory septic shock                                                                 |
| Placebo   | 7                                       | Sepsis secondary to small bowel perforation                                             |
| Placebo   | 29                                      | Long-term post-operative complications of emergency nephrectomy                         |
| Placebo   | 2                                       | Sepsis, stroke, type II respiratory failure                                             |
| Placebo   | 3                                       | Pneumonia and cardiac failure                                                           |
| GM-CSF*   | 10                                      | Pneumonia, multiple comorbidities                                                       |
| GM-CSF**  | 1                                       | Large bowel obstruction, multiple comorbidities                                         |
| GM-CSF    | 5                                       | Chronic obstructive pulmonary disease, type II respiratory failure, acute kidney injury |
| GM-CSF*** | 5                                       | Biliary sepsis                                                                          |

\*, only one dose administered because of transaminitis on day 1

\*\*, only one dose administered

\*\*\*, only one dose administered due to thrombocytopenia.

**Table S5. Adverse events.**

| Day | Placebo                           |                                  |                                                                          | GM-CSF                                                                     |                                                         |                                                  |
|-----|-----------------------------------|----------------------------------|--------------------------------------------------------------------------|----------------------------------------------------------------------------|---------------------------------------------------------|--------------------------------------------------|
|     | Mild                              | Moderate                         | Severe                                                                   | Mild                                                                       | Moderate                                                | Severe                                           |
| 0   | 1. Internal jugular vein thrombus | None                             | None                                                                     | None                                                                       | None                                                    | None                                             |
| 1   | 1. Thrombocytopenia               | None                             | None                                                                     | 1. Fever                                                                   | 1. Thrombocytopenia.<br>2. Raised hepatic transaminases | 1. Bowel obstruction with clinical deterioration |
| 2   | None                              | None                             | None                                                                     | 1. Fever<br>2. Thrombocytopenia                                            | None                                                    | None                                             |
| 3   | None                              | None                             | 1. Pneumomediastinum and bilateral consolidation                         | 1. Fever,<br>2. Raised platelet count<br>3. Raised hepatic transaminases   | None                                                    | None                                             |
| 4   | None                              | None                             | 1. Sudden deterioration with type 2 respiratory failure of unknown cause | 1. Fever                                                                   | None                                                    | None                                             |
| 5   | None                              | None                             | None                                                                     | None                                                                       | None                                                    | None                                             |
| 6   | 1. Hypoglycaemia                  | 1. Increased oxygen requirements | None                                                                     | None                                                                       | None                                                    | None                                             |
| 7   | None                              | None                             | None                                                                     | 1. Internal jugular vein thrombus at central vein catheter insertion site. | None                                                    | None                                             |
| 8   | None                              | None                             | None                                                                     | None                                                                       | None                                                    | None                                             |
| 9   | None                              | None                             | None                                                                     | 1. Raised hepatic transaminases                                            | None                                                    | None                                             |

**Table S6. SOFA scores for all patients who remained on the ICU.**

|                | Sequential Organ Failure Assessment (SOFA) |        |        |        |        |        |        |        |        |        |
|----------------|--------------------------------------------|--------|--------|--------|--------|--------|--------|--------|--------|--------|
|                | Day 0                                      | Day 1  | Day 2  | Day 3  | Day 4  | Day 5  | Day 6  | Day 7  | Day 8  | Day 9  |
| <b>GM-CSF</b>  |                                            |        |        |        |        |        |        |        |        |        |
| n              | 16                                         | 16     | 15     | 14     | 14     | 13     | 11     | 10     | 10     | 9      |
| median         | 9                                          | 9.5    | 7      | 6      | 8      | 6      | 6      | 7      | 6      | 6      |
| range          | (3,19)                                     | (2,15) | (2,15) | (0,13) | (0,14) | (0,14) | (0,14) | (0,14) | (0,14) | (0,13) |
| IQR            | (4,10.5)                                   | (5,13) | (2,11) | (4,10) | (2,9)  | (3,10) | (2,9)  | (3,8)  | (2,9)  | (3,9)  |
| <b>Placebo</b> |                                            |        |        |        |        |        |        |        |        |        |
| n              | 21                                         | 21     | 21     | 19     | 19     | 15     | 15     | 14     | 11     | 14     |
| median         | 8                                          | 7      | 7      | 6      | 5      | 6      | 5      | 4      | 5      | 4.5    |
| range          | (1,13)                                     | (0,14) | (0,14) | (0,13) | (2,10) | (1,10) | (0,12) | (0,15) | (1,15) | (0,12) |
| IQR            | (6,10)                                     | (6,11) | (5,9)  | (4,10) | (3,9)  | (3,8)  | (2,10) | (1,9)  | (2,12) | (1,8)  |

**Table S7. PaO<sub>2</sub>:FiO<sub>2</sub> ratios.** For all intubated and mechanically ventilated patients the lowest and highest PaO<sub>2</sub>:FiO<sub>2</sub> ratios on a given day were recorded. All PaO<sub>2</sub>:FiO<sub>2</sub> values are in kPa.

| Day |           | Placebo      |               | GM-CSF       |               |
|-----|-----------|--------------|---------------|--------------|---------------|
|     |           | Lowest ratio | Highest ratio | Lowest ratio | Highest ratio |
| 0   | n         | 20           | 20            | 16           | 15            |
|     | mean (SD) | 27.4 (13.2)  | 38.3 (17.7)   | 23.0 (11.0)  | 33.9 (14.9)   |
|     | range     | (7.6, 54.5)  | (11.4, 65.0)  | (9.9, 49.5)  | (13.2, 59.1)  |
| 1   | n         | 20           | 20            | 16           | 16            |
|     | mean (SD) | 28.5 (13.5)  | 42.5 (19.4)   | 21.4 (10.8)  | 38.3 (14.3)   |
|     | range     | (7.9, 52.8)  | (9.2, 91.3)   | (8.3, 52.4)  | (18.0, 65.5)  |
| 2   | n         | 20           | 20            | 14           | 14            |
|     | mean (SD) | 27.3 (12.7)  | 38.8 (15.6)   | 27.6 (9.7)   | 37.0 (15.3)   |
|     | range     | (6.7, 50.0)  | (10.6, 61.4)  | (10.9, 43.8) | (16.5, 68.5)  |
| 3   | n         | 19           | 19            | 13           | 13            |
|     | mean (SD) | 26.3 (13.5)  | 44.2 (18.5)   | 28.5 (12.9)  | 38.7 (16.7)   |
|     | range     | (6.4, 51.0)  | (10.9, 69.0)  | (10.9, 47.6) | (12.6, 65.0)  |
| 4   | n         | 19           | 17            | 12           | 12            |
|     | mean (SD) | 31.9 (17.1)  | 41.5 (21.6)   | 25.4 (10.5)  | 37.5 (21.4)   |
|     | range     | (8.8, 70.8)  | (12.2, 92.1)  | (9.2, 42.6)  | (10.4, 92.1)  |
| 5   | n         | 14           | 14            | 12           | 12            |
|     | mean (SD) | 28.7 (15.6)  | 39.7 (16.5)   | 26.1 (13.0)  | 38.5 (16.3)   |
|     | range     | (8.9, 51.9)  | (15.6, 63.5)  | (9.0, 50.6)  | (20.8, 71.5)  |
| 6   | n         | 12           | 13            | 10           | 10            |
|     | mean (SD) | 28.1 (15.7)  | 39.3 (18.0)   | 28.8 (14.1)  | 39.1 (15.8)   |
|     | range     | (7.4, 52.6)  | (11.3, 66.0)  | (7.8, 50.2)  | (9.9, 63.0)   |
| 7   | n         | 10           | 10            | 10           | 10            |
|     | mean (SD) | 28.3 (21.1)  | 40.1 (31.2)   | 29.0 (12.0)  | 37.1 (17.0)   |
|     | range     | (8.1, 71.1)  | (10.4, 92.1)  | (9.8, 46.3)  | (11.2, 60.9)  |
| 8   | n         | 11           | 11            | 10           | 10            |
|     | mean (SD) | 26.2 (20.3)  | 42.8 (31.3)   | 27.3 (14.1)  | 36.5 (14.2)   |
|     | range     | (6.2, 54.6)  | (12.1, 92.1)  | (9.0, 50.2)  | (12.9, 54.6)  |
| 9   | n         | 11           | 11            | 9            | 9             |
|     | mean (SD) | 30.1 (20.1)  | 40.4 (26.1)   | 28.5 (14.0)  | 41.4 (19.5)   |
|     | range     | (8.8, 60.7)  | (11.8, 92.1)  | (9.9, 54.6)  | (12.4, 64.4)  |

**Table S8. Haemoglobin concentrations in those patients who remained in the ICU.**

|         | Haemoglobin (g/L) |              |          |             |            |          |           |          |          |          |
|---------|-------------------|--------------|----------|-------------|------------|----------|-----------|----------|----------|----------|
|         | Day 0             | Day 1        | Day 2    | Day 3       | Day 4      | Day 5    | Day 6     | Day 7    | Day 8    | Day 9    |
| GM-CSF  |                   |              |          |             |            |          |           |          |          |          |
| n       | 17                | 16           | 15       | 15          | 14         | 13       | 11        | 10       | 10       | 10       |
| mean    | 98.5              | 95.6         | 97.2     | 95.5        | 96.6       | 94.9     | 93.4      | 88.2     | 86.9     | 82.1     |
| sd      | 15.8              | 17.8         | 14.6     | 16.1        | 15.4       | 14.0     | 16.3      | 11.9     | 12.1     | 15.8     |
| median  | 102.0             | 99.0         | 98.0     | 98.0        | 98.5       | 95.0     | 91.0      | 83.5     | 85.5     | 81.5     |
| range   | (73,126)          | (62,127)     | (70,124) | (65,121)    | (76,120)   | (72,121) | (66,121)  | (74,105) | (72,107) | (62,110) |
| IQR     | (86,112)          | (82.5,107.5) | (88,107) | (82,110)    | (83,112)   | (88,101) | (81,109)  | (78,102) | (75,95)  | (67,94)  |
| Placebo |                   |              |          |             |            |          |           |          |          |          |
| n       | 21                | 21           | 21       | 20          | 20         | 17       | 14        | 15       | 14       | 15       |
| mean    | 99.3              | 96.3         | 94.4     | 92.0        | 94.1       | 87.6     | 87.6      | 84.2     | 85.1     | 90.1     |
| sd      | 11.0              | 10.8         | 12.5     | 12.8        | 18.1       | 13.2     | 13.0      | 15.1     | 15.5     | 14.8     |
| median  | 102.0             | 93.0         | 91.0     | 91.5        | 93.0       | 85.0     | 85.0      | 81.0     | 82.5     | 86.0     |
| range   | (78, 128)         | (76,119)     | (79,132) | (76,129)    | (71,138)   | (71,125) | (72, 119) | (69,125) | (67,123) | (71,123) |
| IQR     | (90,105)          | (90,105)     | (88,99)  | (83.5,95.0) | (81,101.5) | (79,93)  | (79,92)   | (74,88)  | (73,90)  | (83,93)  |

**Table S9. Platelet counts for those patients who remained in the ICU.**

|         | Platelet count (x 10 <sup>9</sup> /L) |              |           |               |             |             |           |           |           |           |
|---------|---------------------------------------|--------------|-----------|---------------|-------------|-------------|-----------|-----------|-----------|-----------|
|         | Day 0                                 | Day 1        | Day 2     | Day 3         | Day 4       | Day 5       | Day 6     | Day 7     | Day 8     | Day 9     |
| GM-CSF  |                                       |              |           |               |             |             |           |           |           |           |
| n       | 17                                    | 16           | 15        | 15            | 14          | 12          | 11        | 10        | 10        | 10        |
| mean    | 235                                   | 193          | 213       | 220           | 241         | 256         | 288       | 329       | 354       | 348       |
| sd      | 221                                   | 121          | 137       | 144           | 174         | 205         | 227       | 263       | 290       | 323       |
| median  | 208                                   | 202.5        | 243       | 206           | 214         | 209         | 207       | 231       | 298       | 258.5     |
| range   | (52,999)                              | (35,425)     | (28,509)  | (22,509)      | (27,596)    | (47,713)    | (39,752)  | (74,873)  | (82,979)  | (68,1031) |
| IQR     | (97,253)                              | (87.5,257.5) | (98,279)  | (87,290)      | (81,299)    | (108.5,304) | (105,363) | (173,379) | (157,343) | (117,350) |
| Placebo |                                       |              |           |               |             |             |           |           |           |           |
| n       | 21                                    | 21           | 21        | 20            | 20          | 17          | 14        | 15        | 14        | 15        |
| mean    | 172                                   | 159          | 166       | 171           | 199         | 202         | 228       | 274       | 279       | 320       |
| sd      | 74                                    | 86           | 90        | 87            | 109         | 112         | 100       | 127       | 117       | 123       |
| median  | 164                                   | 148          | 142       | 166           | 186.5       | 179         | 220       | 250       | 289       | 354       |
| range   | (62,309)                              | (30,324)     | (8,328)   | (17,370)      | (21,421)    | (61,425)    | (46,410)  | (36,491)  | (46,453)  | (63,477)  |
| IQR     | (101,234)                             | (87,203)     | (101,236) | (106.5,213.5) | (116.5,259) | (115,238)   | (181,276) | (193,362) | (227,359) | (234,419) |

**Table S10. Leukocyte counts for those patients who remained in the ICU.**

|         | Leukocytes count (x10 <sup>9</sup> /L) |             |             |             |             |             |             |             |             |             |
|---------|----------------------------------------|-------------|-------------|-------------|-------------|-------------|-------------|-------------|-------------|-------------|
|         | Day 0                                  | Day 1       | Day 2       | Day 3       | Day 4       | Day 5       | Day 6       | Day 7       | Day 8       | Day 9       |
| GM-CSF  |                                        |             |             |             |             |             |             |             |             |             |
| n       | 17                                     | 16          | 15          | 15          | 14          | 13          | 11          | 10          | 10          | 10          |
| mean    | 16.2                                   | 18.9        | 20.1        | 20.2        | 20.1        | 18.9        | 17.3        | 17.6        | 17.1        | 15.9        |
| sd      | 8.4                                    | 7.7         | 7.8         | 7.1         | 9.0         | 7.6         | 4.8         | 4.0         | 5.0         | 4.6         |
| median  | 14.5                                   | 19.1        | 19.1        | 20.5        | 18.6        | 18.2        | 16.8        | 18.3        | 17.9        | 16.2        |
| range   | (4.8,32.9)                             | (7.7,30.3)  | (7.0,35.7)  | (10.9,37.0) | (11.2,43.8) | (10.6,41.0) | (8.6,22.7)  | (7.7,21.9)  | (6.4,24.2)  | (7.9,21.1)  |
| IQR     | (10.5,21.7)                            | (12.1,25.3) | (14.0,24.3) | (14.8,24.8) | (13.0,24.6) | (13.7,20.3) | (14.5,22.3) | (16.2,20.1) | (15.2,18.6) | (12.4,20.8) |
| Placebo |                                        |             |             |             |             |             |             |             |             |             |
| n       | 21                                     | 21          | 21          | 20          | 20          | 17          | 14          | 15          | 14          | 15          |
| mean    | 11.3                                   | 12.6        | 13.0        | 13.1        | 12.9        | 12.4        | 13.0        | 12.8        | 11.9        | 11.9        |
| sd      | 6.1                                    | 4.5         | 6.0         | 4.7         | 4.2         | 4.1         | 3.6         | 5.8         | 5.4         | 4.9         |
| median  | 11.9                                   | 13.2        | 11.4        | 11.7        | 12.8        | 12.4        | 14.0        | 11.1        | 11.8        | 10.1        |
| range   | (1.9,29.1)                             | (4.2,19.6)  | (4.5,22.4)  | (4.8,22.3)  | (4.4,20.5)  | (5.1,20.1)  | (7.8,17.6)  | (5.0,22.9)  | (4.3,24.8)  | (6.0,21.4)  |
| IQR     | (6.0,12.7)                             | (10.9,15.9) | (9.5,20.2)  | (10.0,17.3) | (11.1,15.7) | (8.3,15.6)  | (9.2,16.1)  | (7.2,16.9)  | (8.2,13.8)  | (8.2,16.5)  |

**Table S11. Urea concentrations for those patients who remained on the ICU.**

|         | Urea (mmol/L) |            |            |            |            |            |            |            |            |            |
|---------|---------------|------------|------------|------------|------------|------------|------------|------------|------------|------------|
|         | Day 0         | Day 1      | Day 2      | Day 3      | Day 4      | Day 5      | Day 6      | Day 7      | Day 8      | Day 9      |
| GM-CSF  |               |            |            |            |            |            |            |            |            |            |
| n       | 17            | 16         | 15         | 15         | 14         | 13         | 11         | 10         | 10         | 10         |
| mean    | 8.29          | 8.52       | 9.54       | 11.27      | 14.07      | 16.68      | 15.59      | 16.51      | 17.62      | 17.81      |
| sd      | 5.53          | 7.48       | 7.94       | 9.84       | 12.22      | 15.11      | 14.04      | 13.95      | 16.77      | 17.02      |
| median  | 6.7           | 5.1        | 6.7        | 7.1        | 9.9        | 10.0       | 11.2       | 9.45       | 7.7        | 10.0       |
| range   | (1.9,22.0)    | (1.5,27.2) | (2.0,30.9) | (2.2,35.8) | (2.5,38.9) | (3.9,51.3) | (4.3,46.3) | (4.9,41.2) | (4.3,45.4) | (4.0,47.0) |
| IQR     | (4.9,9.7)     | (4.3,11.0) | (4.4,15.2) | (5.1,13.5) | (5.6,15.6) | (6.0,20.3) | (6.4,26.2) | (6.4,28.7) | (5.4,36.2) | (4.2,37.8) |
| Placebo |               |            |            |            |            |            |            |            |            |            |
| n       | 21            | 21         | 21         | 20         | 20         | 17         | 14         | 15         | 14         | 15         |
| mean    | 12.04         | 12.49      | 13.32      | 13.64      | 14.24      | 13.95      | 14.74      | 13.19      | 13.48      | 11.85      |
| sd      | 7.33          | 7.47       | 6.66       | 7.26       | 8.87       | 9.44       | 11.25      | 10.79      | 10.73      | 8.41       |
| median  | 11.6          | 9.9        | 12.9       | 12.85      | 11.95      | 11.9       | 11.5       | 9.4        | 11.0       | 9.4        |
| range   | (2.9,30.9)    | (2.7,26.9) | (2.2,24.5) | (2.6,29.8) | (3.6,35.9) | (4.0,39.9) | (3.0,43.5) | (3.1,41.5) | (3.4,41.5) | (4.2,33.0) |
| IQR     | (5.9,16.1)    | (6.8,18.3) | (8.0,19.1) | (9.4,17.6) | (8.6,18.8) | (8.7,14.2) | (6.8,14.9) | (6.1,13.5) | (7.2,13.8) | (5.4,14.0) |

**Table S12. Creatinine concentrations in patients who remained on the ICU.**

|         | Creatinine ( $\mu\text{mol/L}$ ) |            |          |            |          |          |          |          |          |          |
|---------|----------------------------------|------------|----------|------------|----------|----------|----------|----------|----------|----------|
|         | Day 0                            | Day 1      | Day 2    | Day 3      | Day 4    | Day 5    | Day 6    | Day 7    | Day 8    | Day 9    |
| GM-CSF  |                                  |            |          |            |          |          |          |          |          |          |
| n       | 17                               | 16         | 15       | 15         | 14       | 13       | 11       | 10       | 10       | 10       |
| mean    | 107                              | 110        | 113      | 119        | 137      | 161      | 123      | 131      | 146      | 158      |
| sd      | 68                               | 85         | 92       | 102        | 125      | 169      | 113      | 121      | 144      | 151      |
| median  | 83                               | 70.5       | 64       | 65         | 76       | 75       | 69       | 67.5     | 80.5     | 71       |
| range   | (40,266)                         | (44,290)   | (40,343) | (38,393)   | (35,458) | (36,617) | (36,396) | (38,409) | (36,469) | (33,469) |
| IQR     | (54,146)                         | (51,157.5) | (51,191) | (54,168)   | (49,189) | (57,177) | (51,180) | (47,214) | (41,236) | (42,250) |
| Placebo |                                  |            |          |            |          |          |          |          |          |          |
| n       | 21                               | 21         | 21       | 20         | 20       | 17       | 14       | 15       | 14       | 15       |
| mean    | 130                              | 140        | 138      | 135        | 139      | 135      | 146      | 138      | 140      | 134      |
| sd      | 71                               | 75         | 73       | 80         | 94       | 87       | 88       | 95       | 88       | 92       |
| median  | 132                              | 124        | 122      | 121        | 98.5     | 112      | 133      | 109      | 112.5    | 110      |
| range   | (59,354)                         | (56,323)   | (51,298) | (49,328)   | (53,385) | (50,371) | (49,347) | (44,368) | (42,335) | (43,347) |
| IQR     | (73,153)                         | (76,171)   | (76,176) | (73.5,167) | (74,169) | (75,150) | (73,183) | (61,226) | (88,218) | (58,194) |

**Table S13. Alanine aminotransferase concentrations in patients who remained on the ICU.**

|         | Alanine aminotransferase (IU/L) |           |          |             |          |           |          |           |          |          |
|---------|---------------------------------|-----------|----------|-------------|----------|-----------|----------|-----------|----------|----------|
|         | Day 0                           | Day 1     | Day 2    | Day 3       | Day 4    | Day 5     | Day 6    | Day 7     | Day 8    | Day 9    |
| GM-CSF  |                                 |           |          |             |          |           |          |           |          |          |
| n       | 17                              | 15        | 15       | 13          | 14       | 12        | 10       | 8         | 10       | 9        |
| mean    | 67                              | 110       | 95       | 40          | 65       | 51        | 55       | 43        | 53       | 55       |
| sd      | 109                             | 204       | 160      | 20          | 89       | 36        | 56       | 20        | 33       | 36       |
| median  | 27                              | 38        | 44       | 37          | 45       | 38        | 35       | 41        | 39       | 33       |
| range   | (13,449)                        | (14,812)  | (15,646) | (16,85)     | (17,365) | (17,137)  | (16,206) | (17,85)   | (17,114) | (19,120) |
| IQR     | (17,43)                         | (20,80)   | (21,68)  | (20,49)     | (22,58)  | (24.5,75) | (31,59)  | (32.5,49) | (31,74)  | (29,75)  |
| Placebo |                                 |           |          |             |          |           |          |           |          |          |
| n       | 21                              | 20        | 20       | 20          | 18       | 16        | 14       | 14        | 13       | 13       |
| mean    | 83                              | 68        | 53       | 47          | 50       | 75        | 97       | 103       | 80       | 58       |
| sd      | 185                             | 124       | 78       | 58          | 52       | 110       | 164      | 180       | 106      | 69       |
| median  | 27                              | 22.5      | 20       | 24          | 27       | 23        | 23       | 27.5      | 28       | 27       |
| range   | (10,685)                        | (11,446)  | (12,305) | (11,229)    | (12,204) | (13,419)  | (12,626) | (10,692)  | (13,369) | (11,218) |
| IQR     | (17,34)                         | (15.5,38) | (16,44)  | (15.5,39.5) | (19,70)  | (18,82.5) | (17,91)  | (22,91)   | (17,86)  | (16,44)  |

**Table S14. Aspartate aminotransferase concentrations measured in patients who remained on the ICU.**

|         | Aspartate aminotransferase (IU/L) |           |          |          |          |           |              |             |           |          |
|---------|-----------------------------------|-----------|----------|----------|----------|-----------|--------------|-------------|-----------|----------|
|         | Day 0                             | Day 1     | Day 2    | Day 3    | Day 4    | Day 5     | Day 6        | Day 7       | Day 8     | Day 9    |
| GM-CSF  |                                   |           |          |          |          |           |              |             |           |          |
| n       | 15                                | 15        | 15       | 13       | 11       | 11        | 10           | 8           | 7         | 8        |
| mean    | 99                                | 201       | 76       | 31       | 45       | 39        | 34           | 46          | 53        | 52       |
| sd      | 109                               | 508       | 140      | 16       | 36       | 31        | 21           | 33          | 44        | 46       |
| median  | 71                                | 58        | 35       | 27       | 40       | 28        | 29           | 40.5        | 43        | 39.5     |
| range   | (19,439)                          | (24,2030) | (16,574) | (14,70)  | (10,135) | (10,102)  | (12,84)      | (11,118)    | (15,144)  | (15,155) |
| IQR     | (42,92)                           | (33,104)  | (24,49)  | (19,38)  | (22,46)  | (19,45)   | (21,41)      | (24.5,56.5) | (17,61)   | (20,64)  |
| Placebo |                                   |           |          |          |          |           |              |             |           |          |
| n       | 19                                | 17        | 19       | 18       | 18       | 14        | 12           | 12          | 11        | 9        |
| mean    | 151                               | 116       | 70       | 61       | 59       | 206       | 258          | 69          | 113       | 42       |
| sd      | 362                               | 239       | 94       | 59       | 44       | 513       | 665          | 62          | 168       | 27       |
| median  | 34                                | 35        | 41       | 36.5     | 48.5     | 41.5      | 41.5         | 39.5        | 50        | 43       |
| range   | (15,1617)                         | (11,1017) | (11,415) | (11,243) | (11,166) | (14,1973) | (13,2360)    | (16,226)    | (14, 578) | (10,90)  |
| IQR     | (26,108)                          | (24,79)   | (20,64)  | (23,83)  | (24,76)  | (20,166)  | (23.5,112.5) | (25,101.5)  | (19,118)  | (16,62)  |

**Figure S1. Monocyte HLA-DR illustrated as individual points.**

Monocyte HLA-DR was quantified by flow cytometry using a commercial Quantibrite kit at day 0, ie baseline, before treatment, day 2, day 4/5, day 6/7 and day 8/9.

**Figure S2. Circulating cytokine measurements.**

Cytokine concentrations were determined by cytometric bead array (Becton Dickinson). (A) IL-6, (B) IL-8, (C) IL-1 $\beta$ , (D) IL-10, (E) TNF $\alpha$ , (F) GM-CSF and (G) IL12-p70. White columns = placebo, dark columns = GM-CSF.

## GM-CSF: Statistical Analysis Plan for RCT

**Full title (Overall study):** DOES GM-CSF RESTORE EFFECTIVE NEUTROPHIL FUNCTION IN CRITICALLY ILL PATIENTS?

### Objectives

**(Overall study):** To test whether clinical administration of GM-CSF replicates the effects seen *ex vivo*, in the blood of critically ill patients, by restoring neutrophil phagocytosis.

**Trial arms:** 2 groups defined by treatment. Recruitment of 19 patients per group was intended with random allocation by randomised block randomisation used to allocate treatment:

Group 1: GM-CSF

Group 2: Placebo

Intervention group was blinded to both investigators and participants excepting that trial monitoring was conducted on an unblinded basis. Unblinding will take place immediately prior to analysis of the data.

### Outcome measures:

#### Primary:

- Neutrophil phagocytic capacity 2 days after administration of GM-CSF/placebo (as measured by the percentage of neutrophils ingesting  $\geq 2$  zymosan particles *ex vivo*).

#### Secondary:

##### Biological measures:

- Sequential neutrophil phagocytic capacity (to determine sustainability of any observed effects in the primary endpoint)
- Neutrophil phagocytic capacity measured as 'area under the curve' over the study period.  
Other assessments of neutrophil function:
  - Reactive oxygen species (ROS) generation (continuous measure)
  - Distances migrated on a chemotaxis assay (change from baseline)
  - Apoptotic rate (proportion of cells identified as apoptotic by flow cytometric criteria, and/or by morphological criteria)
- Sequential monocyte HLA-DR expression.
- If available; serum/plasma measures of inflammatory and anti-inflammatory mediators. It will be recorded whether unblinding of patients took place before this data was available for analysis.

##### Clinical Measures:

- Baseline clinical and demographic measurements. The following will be summarised by group but not subject to further analysis:
  - Age
  - Gender
  - Weight
  - Apache II score (at admission)
  - Smoking status

- Dichotomous co-morbidity indicators for:
  - Arthritis
  - Osteoporosis
  - Asthma
  - COPD
  - ARDS
  - Emphysema
  - Angina
  - Congestive heart failure
  - MI
  - Neurological disease
  - Cerebrovascular disease
  - Peripheral vascular disease
  - Diabetes
  - Upper GI disease
  - Depression
  - Anxiety/panic disorders
  - Visual impairment
  - Hearing impairment
  - Obesity
  - Degenerative disc disease
- Sequential organ failure assessment (SOFA) score (to be treated as an ordinal outcome; change from baseline to day 7 (3 days after final dose) will also be considered in this way)
- Length of stay in ICU
- The incidence of ICUAIs (as defined by Hospitals in Europe Link for Infection Control Surveillance (HELICS) criteria)
- All cause mortality 30 days post randomisation
- Number of days of mechanical ventilation

**Safety measures:**

- Full blood count – including haemoglobin level and platelet count
- White cell count including neutrophil, monocyte, eosinophil and lymphocyte counts
- Urea and electrolytes (sodium, potassium, urea, creatinine) and liver function tests (alkaline phosphatase, gamma glutamyl transferase, alanine aminotransferase, aspartate aminotransferase)

Serious adverse events (SAEs) and occurrence of suspected unexpected serious adverse reactions (SUSARs) will also be recorded but not subject to formal analysis beyond tabulation by group.

**Analysis:** As this is a phase 2 clinical study, with relatively small numbers of participants, we will principally report descriptive statistics. Data for the outcomes stated above will be summarised within each dosing group using descriptive statistics (means and standard deviations for continuous data and frequencies, medians and interquartile ranges for ordinal data, proportions/rates for dichotomous/categorical data). Confidence intervals will also be presented as appropriate.

Summaries of demographic and operational information (such as number of withdrawals) will also be reported in a similar fashion. The change in the primary outcome measure between baseline and the primary outcome point of 2 days after treatment administration as a patient level outcome will also be considered.

We will also explore comparative analysis of the primary endpoint (neutrophil phagocytic capacity at 2 days after administration of GM-CSF/placebo) between the treatment groups although, due to the sample size, this will be exploratory in nature rather than definitive.

The analysis groups will be compared for the primary outcome using a 2-sample t-test. Should data be considered to be non-normal the alternative non-parametric test (Mann-Whitney) will be used. With the small sample size, normality will be assessed graphically via probability plots & histograms and by consideration of the mean and median values.

Additional analysis will be performed using Analysis of Covariance (ANCOVA) in order to adjust for the effects of site (the stratification factor) and the baseline value of the outcome measure (if appropriate). Should a potentially clinically and statistically significant difference between groups be observed, consideration will be given to additionally adjusting for baseline clinical and demographic covariates. However, as this analysis is exploratory in nature given the sample size of the study it is not likely that the model will support additional covariates.

This measure will also be analysed using ANCOVA in the above manner at the following time points: Baseline/day 0 (without the baseline adjustment), day 2, day 4/5, day 6/7 & day 8/9.

Again, however this analysis can only be considered exploratory due to the small sample size.

Secondary endpoints (other than baseline clinical and demographic measures as outlined, the SOFA score and safety measures described below) will be examined using similar methods with consideration given to comparative analyses as described for the primary outcome. However, dichotomous variables would be analysed in an exploratory fashion using either chi-squared or Fisher's exact tests (in place of the t-test) and logistic regression in place of ANCOVA to adjust for the effects of site and baseline values. As for the primary outcome no further covariates will be considered and these analyses would be considered to be exploratory in nature. The neutrophil phagocytic capacity will be considered in any comparative analysis at fixed time points only as described earlier.

Group membership will initially be defined on an Intention to treat basis. Following the primary ITT analysis as described above, further sub-group analysis will be performed by separate consideration of those who received at least two doses of treatment and those who received fewer. Additionally, length of stay in ICU, incidence of ICUAIs & number of days of mechanical ventilation will be summarised separately by group for those patients surviving to the end of the trial.

Statistical significance, where appropriate, will be set at 0.05.

**Safety data:**

Although the incidence of ICUAIs and 30-day mortality will be documented and descriptive statistics presented, these important clinical endpoints are not included as outcome variables in the data

analysis as this proof of concept study is not adequately powered to assess these. Other safety measures, other than AE and SAE numbers, may be subject to comparative analysis as described for the secondary outcome measures above.

**Missing data:**

Data with missing observations (other than due to mortality) will be examined to determine both the extent of and reason for such omissions. Any missing data will be described. The use of multiple imputation techniques may be considered for the primary outcome alone should data be missing on the primary outcome measure for participants completing the study to a sufficient extent (approximately >10%) but given the exploratory nature of this study it is unlikely that this approach would be felt to be informative.

**Software:** Unless otherwise stated analyses will be carried out using the following computer software (versions and attributions to be recorded at time of use):

- Stata (as first choice software).
- Other software if considered appropriate (use to be recorded).
